# Supplementary material for: One-step hydrothermal synthesis of Se-doped NiTe electrocatalysts for efficient hydrogen production from saline water assisted by anodic iodide oxidation
Source: Royal Society of Chemistry journal article supplement (doi:10.1039/d3ta04387h), 2023-01-01
Supplement: d3ta04387h1.pdf [file d3ta04387h1.pdf]

Electronic Supplementary Material (ESI) for Journal of Materials Chemistry A.  
This journal is © The Royal Society of Chemistry 2023

## **One-step hydrothermal synthesis of Se-doped NiTe electrocatalysts for efficient hydrogen production from saline water assisted by the anodic iodide oxidation**

Hao Tan,<sup>a, b</sup> Zhipeng Yu,<sup>\*b</sup> Alec P. LaGrow,<sup>c</sup> Shiyu Ma,<sup>a</sup> Jingwei Wang,<sup>b</sup> Hong Li,<sup>a</sup> Dehua Xiong<sup>\*a</sup> and Lifeng Liu<sup>\*b, d</sup>

<sup>a</sup>State Key Laboratory of Silicate Materials for Architectures, Wuhan University of Technology, Wuhan 430070, P. R. China

<sup>b</sup>Songshan Lake Materials Laboratory, Dongguan 523808, P. R. China

<sup>c</sup>Scientific Imaging Section, Okinawa Institute of Science and Technology Graduate University, Kunigami-gun, Okinawa 904-0412, Japan

<sup>d</sup>Clean Energy Cluster, International Iberian Nanotechnology Laboratory (INL), Braga 4715-330, Portugal

\*Corresponding authors:

E-mail address: [zhipeng-yu@outlook.com](mailto:zhipeng-yu@outlook.com) (Z. P. Yu); [xiongdehua@whut.edu.cn](mailto:xiongdehua@whut.edu.cn) (D. H. Xiong);

[liu.lifeng@sslslab.org.cn](mailto:liu.lifeng@sslslab.org.cn) (L. Liu)

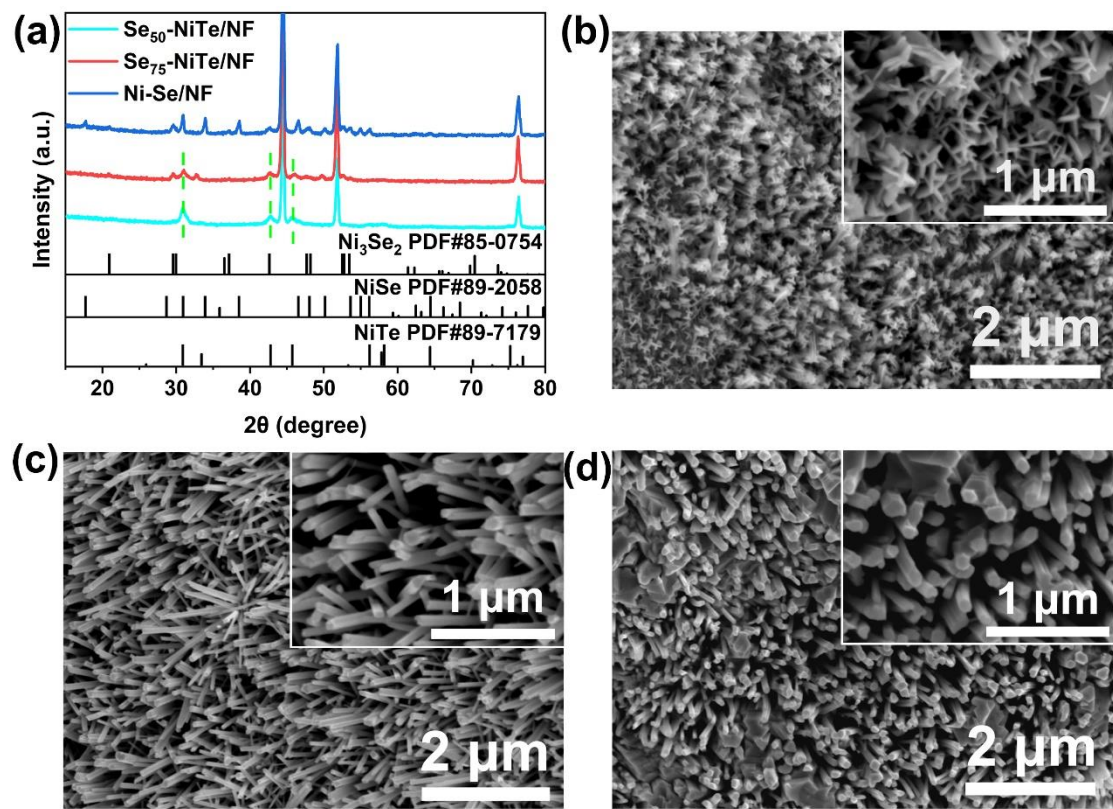

**Fig. S1** (a) XRD patterns and (b) SEM images of Se<sub>50</sub>-NiTe/NF, Se<sub>75</sub>-NiTe/NF and Ni-Se/NF electrodes.

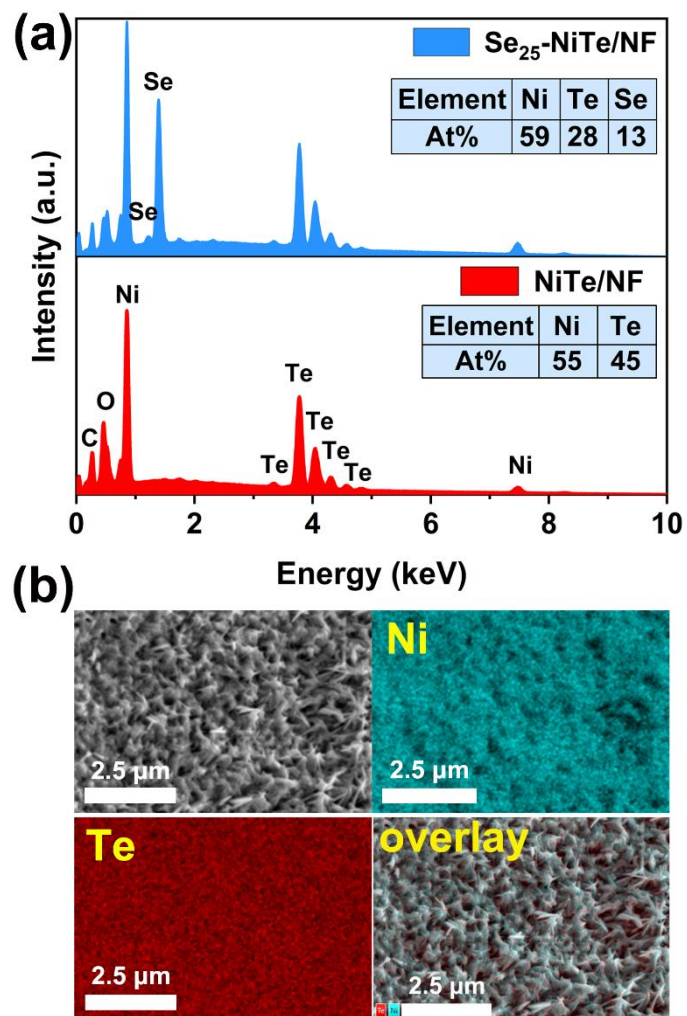

**Fig. S2** (a) EDS spectra of the NiTe/NF and Se<sub>25</sub>-NiTe/NF electrodes. (b) SEM image and the corresponding elemental maps of the NiTe/NF electrode.

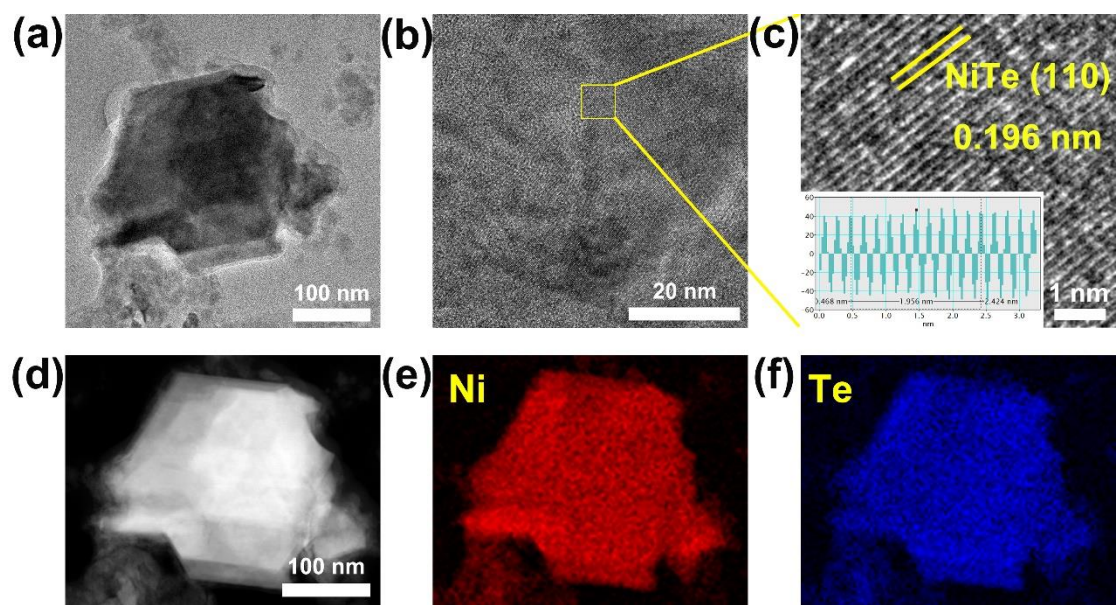

**Fig. S3** (a) TEM image, (b-c) HRTEM images, (d) HAADF-STEM image and (e-f) the corresponding elemental maps of the NiTe/NF catalyst.

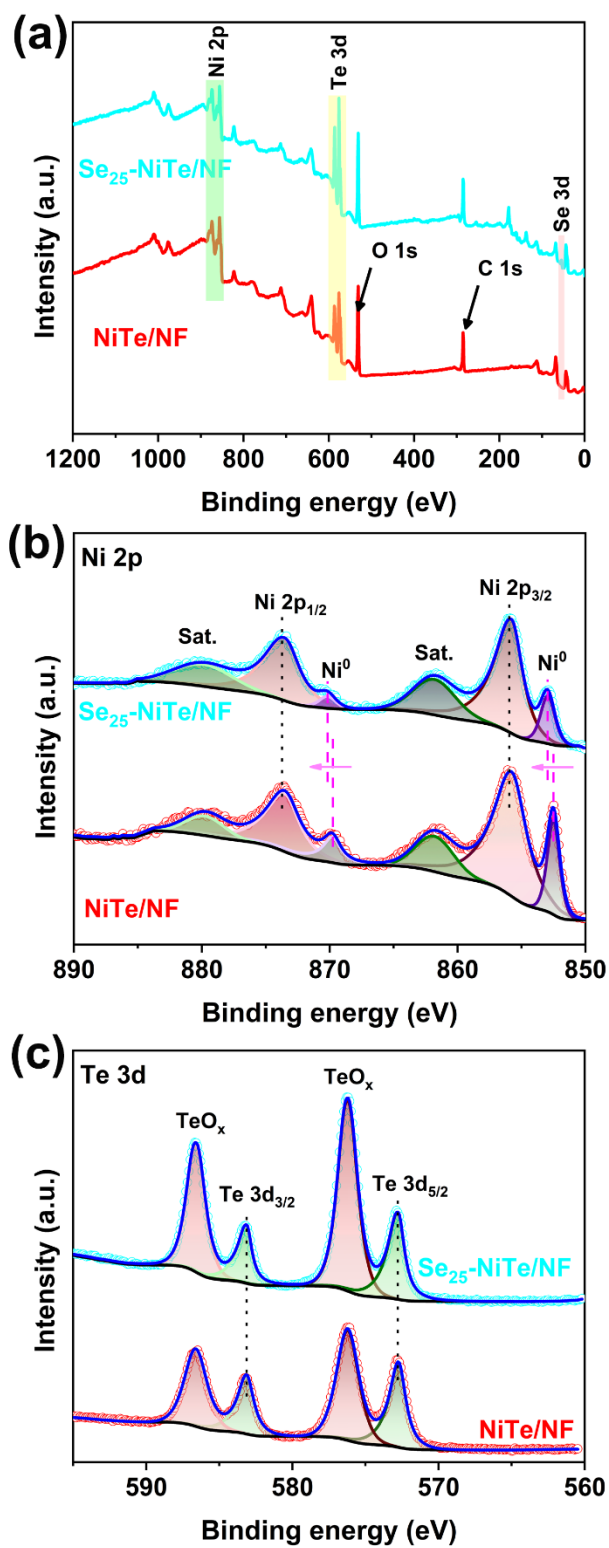

**Fig. S4** (a) XPS survey spectrum. High-resolution (b) Ni 2p and (c) Te 3d XPS spectra of the NiTe/NF and  $\text{Se}_{25}\text{-NiTe/NF}$  electrodes.

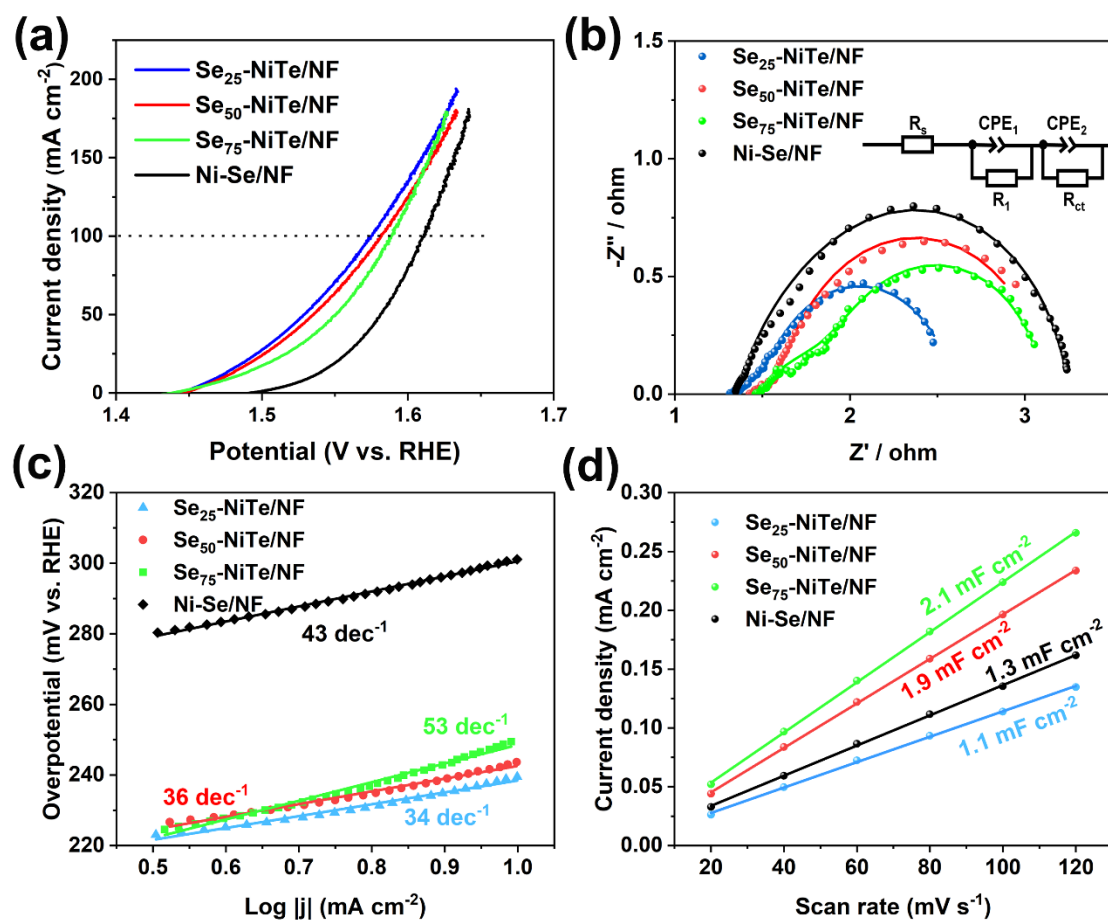

**Fig. S5** Electrocatalytic performance of the Se-NiTe/NF electrodes with different selenium doping amounts tested in 1.0 M KOH + 0.5 M NaCl electrolyte. (a) Polarization curves. (b) Nyquist plots. Inset: equivalent circuit model used for fitting. (c) Tafel plots, and (d)  $C_{dl}$  values.



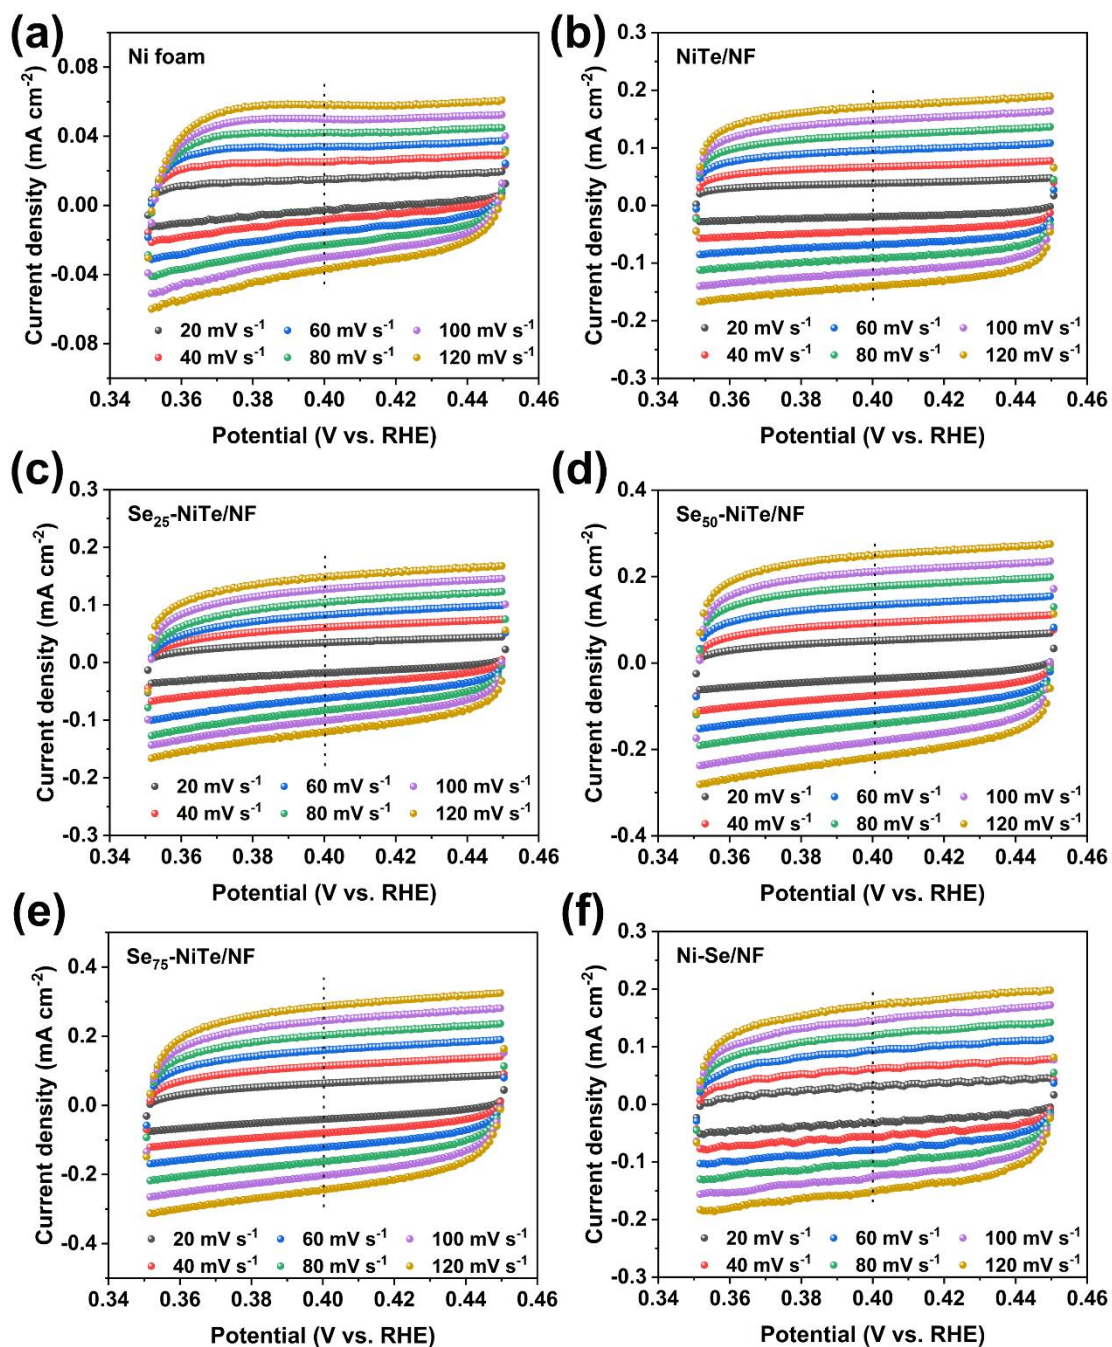

**Fig. S6** The CV curves (Potential ranging from 0.35 – 0.45 V vs. RHE) of different electrocatalysts recorded at various scan rates from 20 to 120 mV s<sup>-1</sup>. (a) Bare Ni foam, (b) NiTe/NF, (c) Se<sub>25</sub>-NiTe/NF, (d) Se<sub>50</sub>-NiTe/NF, (e) Se<sub>75</sub>-NiTe/NF, and (f) Ni-Se/NF.

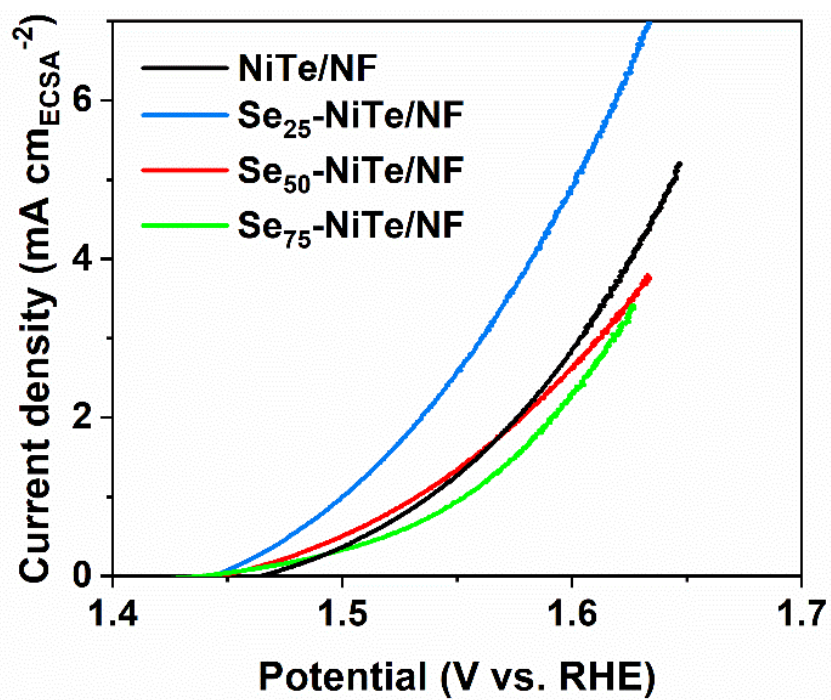

**Fig. S7** ECSA normalized specific activities of NiTe/NF, Se<sub>25</sub>-NiTe/NF, Se<sub>50</sub>-NiTe/NF, and Se<sub>75</sub>-NiTe/NF.



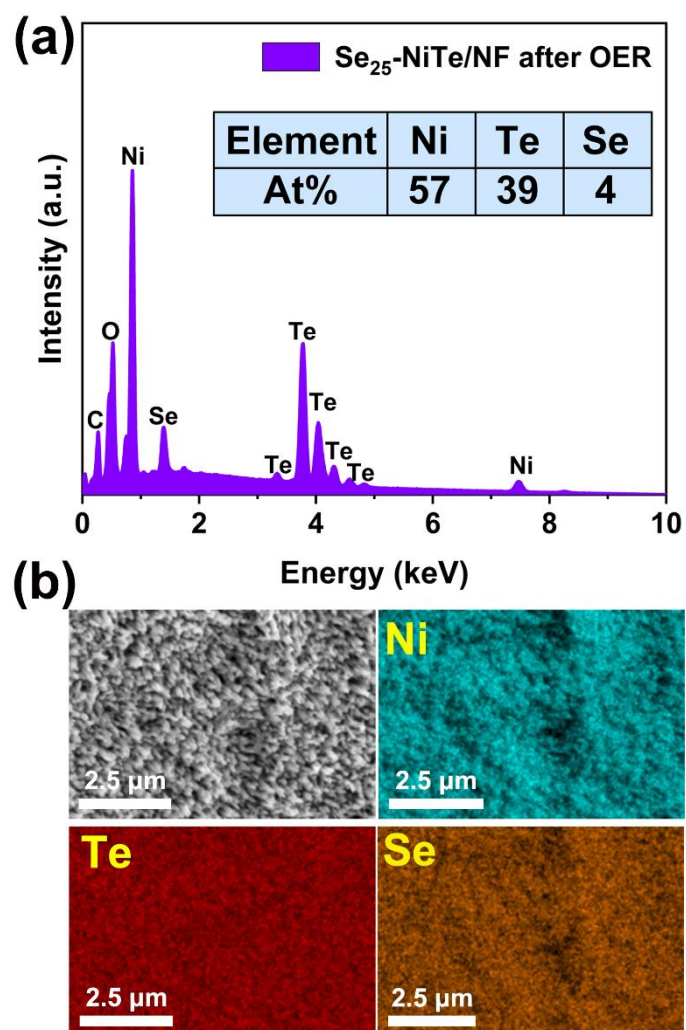

**Fig. S8** (a) EDS spectra and (b) SEM image and the corresponding elemental maps of the  $\text{Se}_{25}\text{-NiTe/NF}$  electrode after the OER stability test ( $100 \text{ mA cm}^{-2}$  for 200 hours in  $1.0 \text{ M KOH} + 0.5 \text{ M NaCl}$  electrolyte).

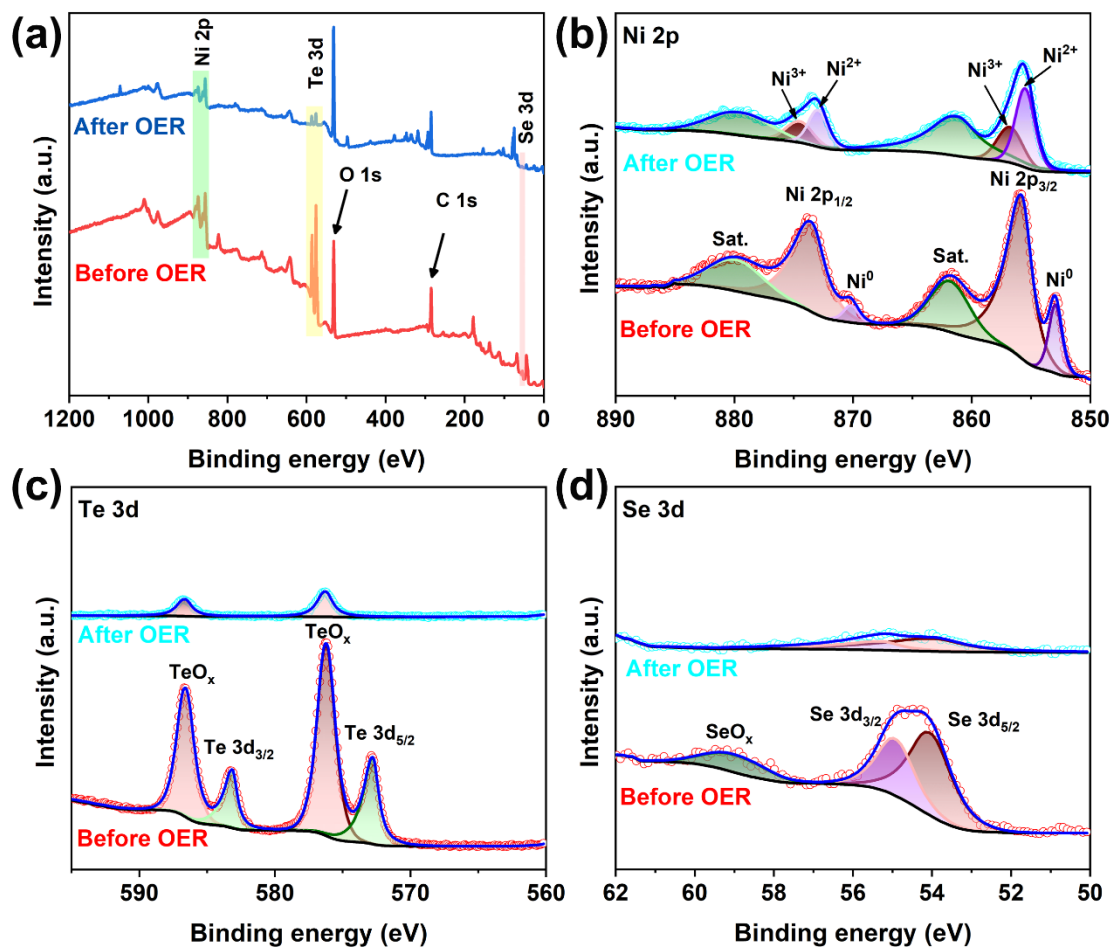

**Fig. S9** (a) XPS survey spectrum. High-resolution XPS spectra in the (b) Ni 2p, (c) Te 3d and (d) Se 3d regions acquired from the Se<sub>25</sub>-NiTe/NF electrode before and after the OER chronopotentiometry at a current density of 100 mA cm<sup>-2</sup> in 1.0 M KOH + 0.5 M NaCl electrolyte.

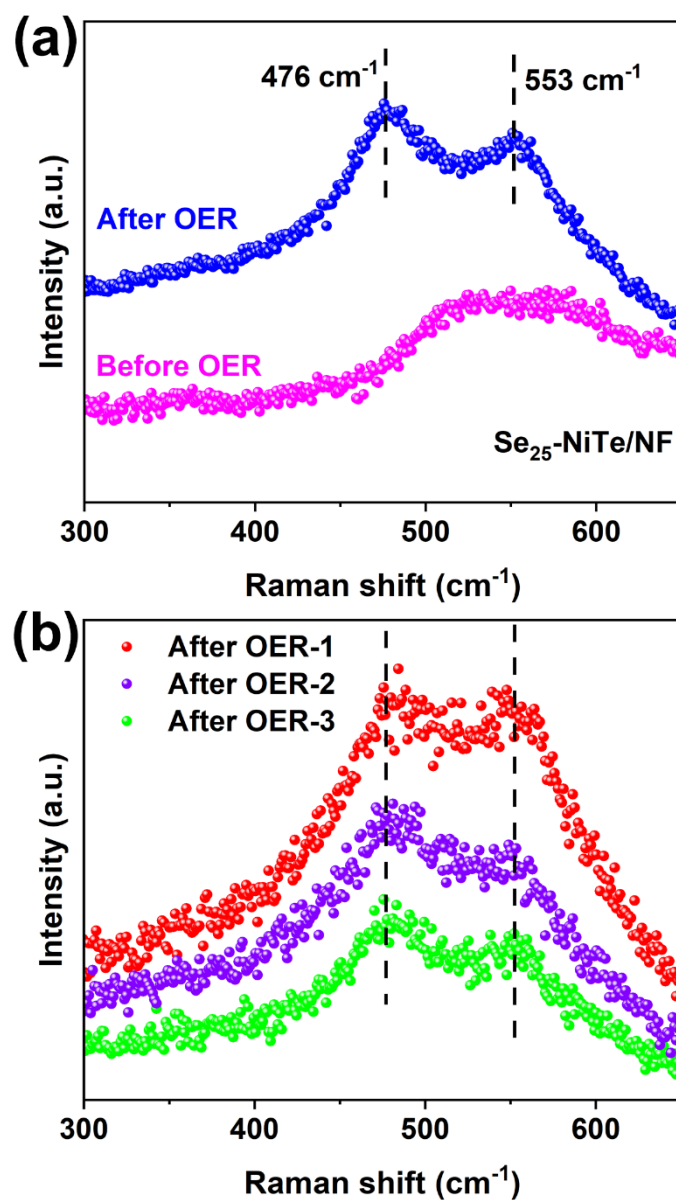

**Fig. S10** (a) Raman spectra of the Se<sub>25</sub>-NiTe/NF electrode before and after the OER stability test in alkaline-saline water solution (100 mA cm<sup>-2</sup> for 200 hours). (b) Raman spectra acquired at different positions over the same piece of electrode after the OER.

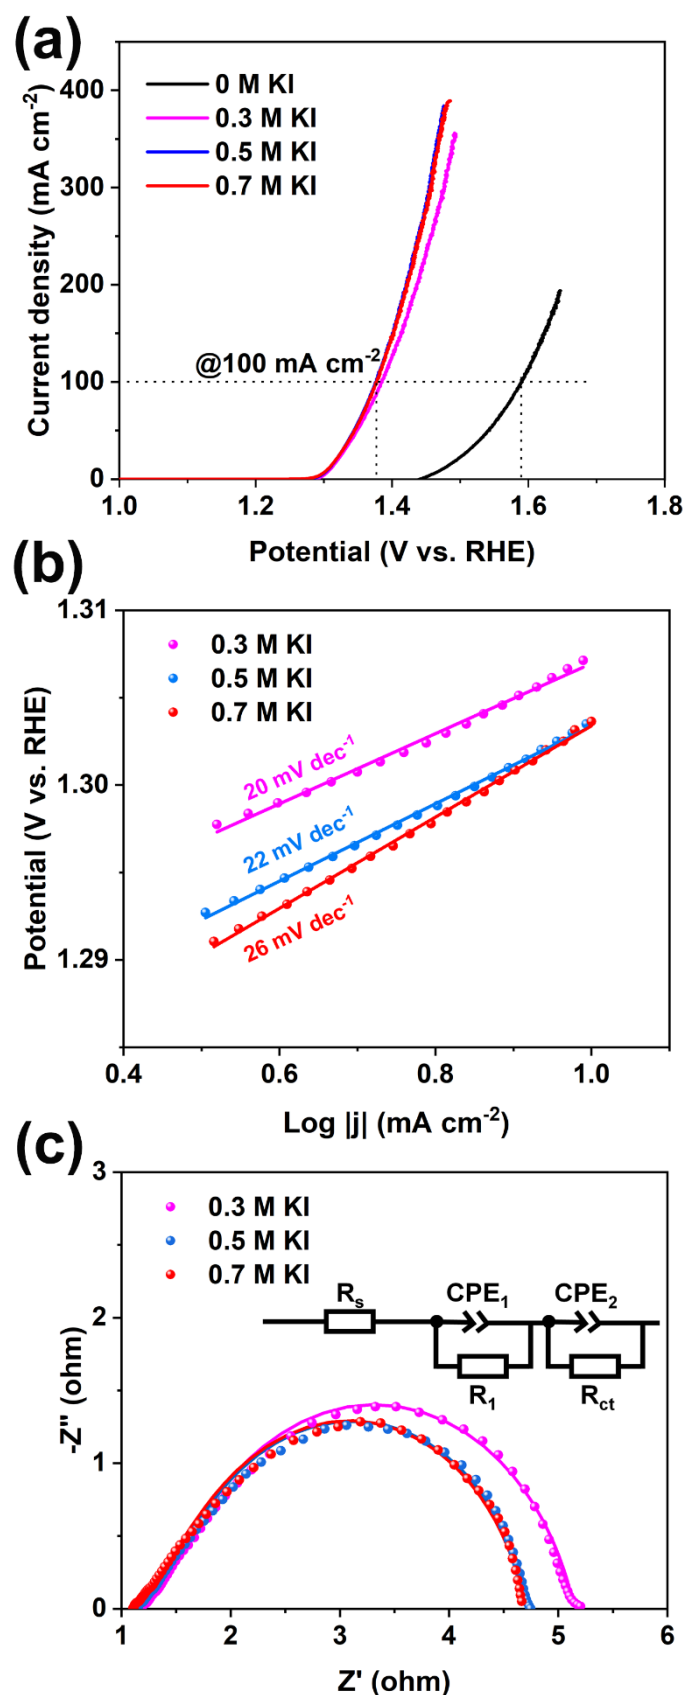

**Fig. S11** (a) IOR polarization curves, (b) Tafel plots, and (c) Nyquist plots of the  $\text{Se}_{25}\text{-NiTe/NF}$  electrode recorded in simulated seawater electrolyte (1.0 M KOH + 0.5 M NaCl) in the presence of different molar concentrations of KI.

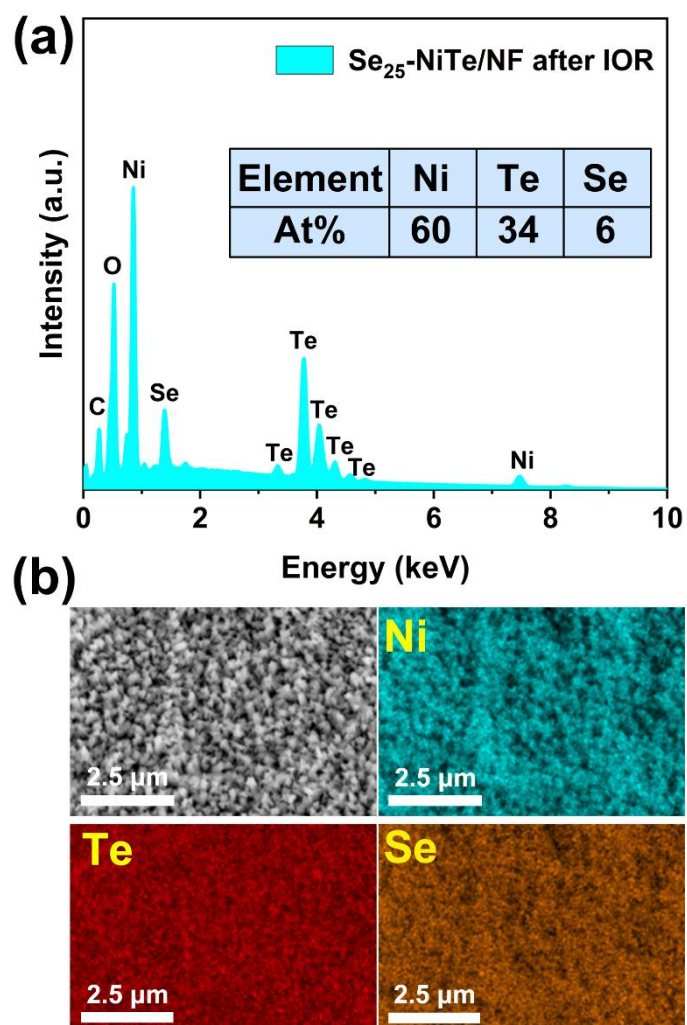

**Fig. S12** (a) EDS spectra and (b) SEM image and the corresponding elemental maps of the  $\text{Se}_{25}\text{-NiTe/NF}$  electrode after the IOR stability test ( $100 \text{ mA cm}^{-2}$  for 500 hours in  $1.0 \text{ M KOH} + 0.5 \text{ M NaCl} + 0.5 \text{ M KI}$  electrolyte).

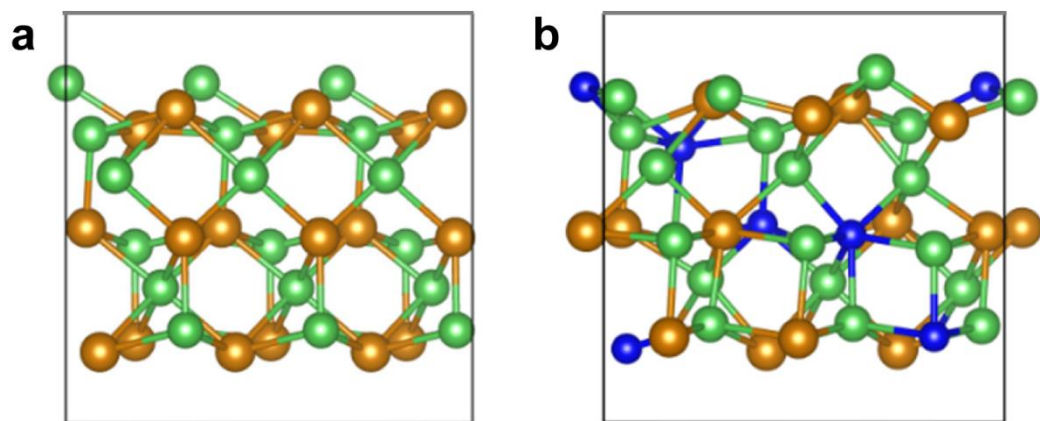

**Fig. S13** Optimized configurations for (a) the NiTe and (b) the Se-NiTe catalyst. The green, brown and blue spheres represent Ni, Te and Se, respectively.



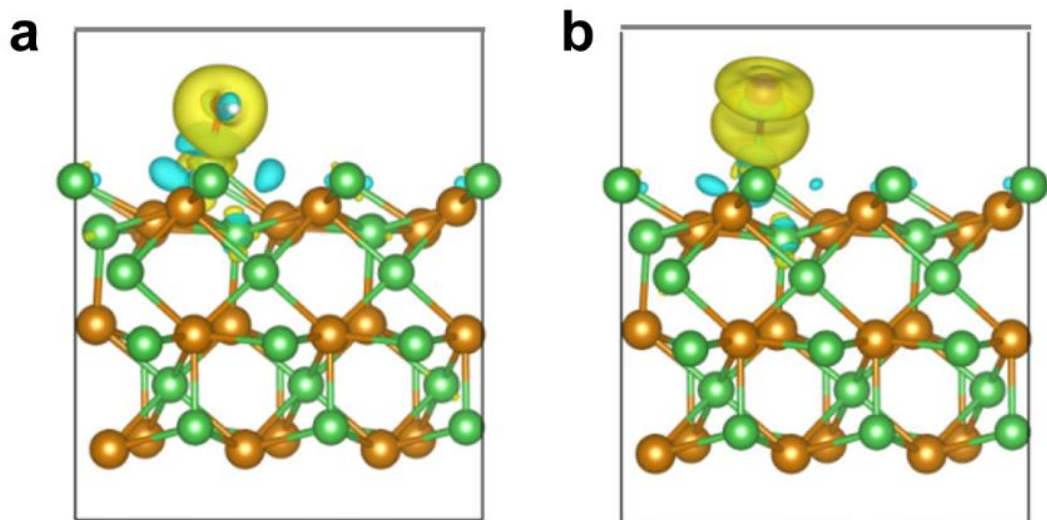

**Fig. S14** The structural model and the corresponding charge density difference on pristine NiTe toward the (a)  $^*OH$  and (b)  $I^*$  adsorption. The green, brown, red, white and purple spheres represent Ni, Te, O, H and I, respectively. The yellow or cyan regions indicate the accumulation or depletion of the charges, respectively.

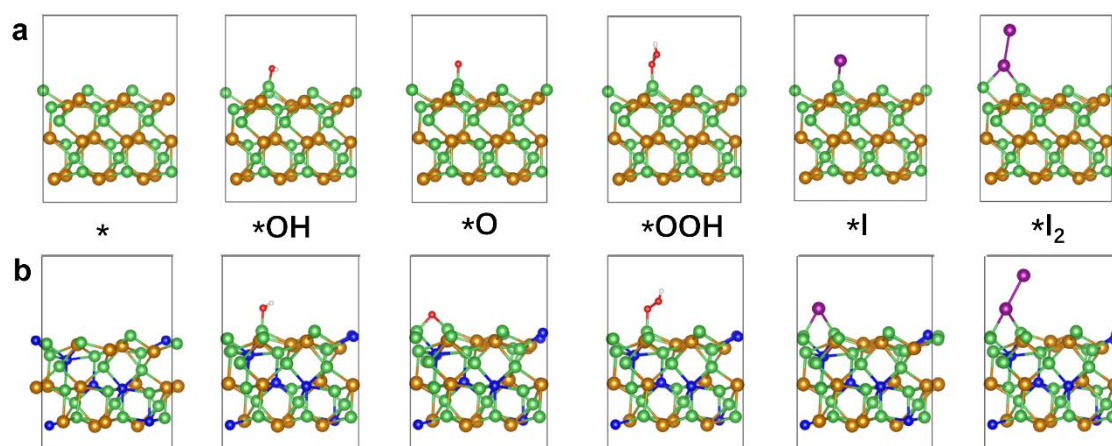

**Fig. S15** The 3D configurations of (a) the NiTe and (b) the Se-NiTe catalyst during the OER and IOR. The green, brown, blue, red, white and purple spheres represent Ni, Te, Se, O, H and I, respectively.

**Table S1.** The fitting parameters of the EIS spectra of all samples under investigation.

| Electrodes                | $R_s(\Omega)$ | $CPE_1$ | $R_1(\Omega)$ | $CPE_2$ | $R_{ct}(\Omega)$ | Electrolyte                       |
|---------------------------|---------------|---------|---------------|---------|------------------|-----------------------------------|
| Ni foam                   | 1.43          | 0.00042 | 0.019         | 0.01    | 2.74             |                                   |
| NiTe/NF                   | 1.42          | 1.52    | 0.50          | 3.34    | 1.27             |                                   |
| Se <sub>25</sub> -NiTe/NF | 1.33          | 1.70    | 0.38          | 3.81    | 0.91             | 1.0 M KOH + 0.5 M NaCl            |
| Se <sub>50</sub> -NiTe/NF | 1.44          | 1.92    | 0.32          | 3.75    | 1.39             |                                   |
| Se <sub>75</sub> -NiTe/NF | 1.48          | 0.56    | 0.60          | 2.56    | 1.06             |                                   |
| Ni-Se/NF                  | 1.34          | 0.96    | 0.44          | 0.53    | 1.48             |                                   |
| Ni foam                   | 1.15          | 0.015   | 0.75          | 0.0037  | 4.21             |                                   |
| NiTe/NF                   | 1.15          | 0.021   | 2.56          | 0.036   | 1.87             | 1.0 M KOH + 0.5 M NaCl + 0.5 M KI |
| Se <sub>25</sub> -NiTe/NF | 1.15          | 0.16    | 0.65          | 0.078   | 2.94             |                                   |
| Se <sub>25</sub> -NiTe/NF | 1.18          | 0.19    | 0.51          | 0.088   | 3.45             | 1.0 M KOH + 0.5 M NaCl + 0.3 M KI |
| Se <sub>25</sub> -NiTe/NF | 1.10          | 0.14    | 0.71          | 0.070   | 2.89             | 1.0 M KOH + 0.7 M NaCl + 0.7 M KI |

**Table S2.** Comparison of the OER or SMOR performance of the Se<sub>25</sub>-NiTe/NF electrode with that of other catalysts reported recently in the literature.

| Catalysts/catalytic electrodes                                       | Electrolyte                                                       | Potential @ 10 or 100 mA cm <sup>-2</sup> (V vs. RHE) | Stability                             | References |
|----------------------------------------------------------------------|-------------------------------------------------------------------|-------------------------------------------------------|---------------------------------------|------------|
| Se <sub>25</sub> -NiTe/NF                                            | 1.0 M KOH + 0.5 M NaCl                                            | 1.47 @10 mA cm <sup>-2</sup>                          | 100 mA cm <sup>-2</sup> for 200 hours | This work  |
|                                                                      | 1.0 M KOH + 0.5 M NaCl +0.5 M KI                                  | 1.38 @100 cm <sup>-2</sup>                            | 100 mA cm <sup>-2</sup> for 500 hours |            |
| NiMn-LDH                                                             | 1.0 M KOH + 3 M CH <sub>3</sub> OH                                | 1.41 @100 cm <sup>-2</sup>                            | \                                     | S1         |
| N-Co <sub>9</sub> S <sub>8</sub> /Ni <sub>3</sub> S <sub>2</sub> /NF | 1.0 M KOH + 0.5 M CO(NH <sub>2</sub> ) <sub>2</sub>               | 1.37 @100 cm <sup>-2</sup>                            | 20 mA cm <sup>-2</sup> for 20 hours   | S2         |
| Ni <sub>3</sub> N/Mo <sub>2</sub> N                                  | 1.0 M KOH+ 0.33 M CO(NH <sub>2</sub> ) <sub>2</sub>               | 1.36 @100 cm <sup>-2</sup>                            | 1.38 V for 40 hours                   | S3         |
| Ni(OH) <sub>2</sub> /NF                                              | 1.0 M KOH + 0.5 M CH <sub>3</sub> OH                              | 1.36 @100 cm <sup>-2</sup>                            | \                                     | S4         |
| V <sub>8</sub> C <sub>7</sub> /CoP-0.18                              | 1.0 M KOH+ 0.33 M CO(NH <sub>2</sub> ) <sub>2</sub>               | 1.67 @100 cm <sup>-2</sup>                            | 10 mA cm <sup>-2</sup> for 20 hours   | S5         |
| Ni-Mo-N/CFC                                                          | 1.0 M KOH + 0.1 M C <sub>3</sub> H <sub>5</sub> (OH) <sub>3</sub> | 1.51 @100 cm <sup>-2</sup>                            | \                                     | S6         |
| Fe-NiO/NiS <sub>2</sub>                                              | 1.0 M KOH                                                         | 1.50 @10 mA cm <sup>-2</sup>                          | 10 mA cm <sup>-2</sup> for 100 hours  | S7         |
| CoO@S-CoTe                                                           | 1.0 M KOH                                                         | 1.476 @10 mA cm <sup>-2</sup>                         | 50 mA cm <sup>-2</sup> for 36 hours   | S8         |
| Ni <sub>2</sub> P-CoCH/CFP                                           | 1.0 M KOH                                                         | 1.50 @10 mA cm <sup>-2</sup>                          | 20 mA cm <sup>-2</sup> for 50 hours   | S9         |

## References

- S1. B. Zhu, B. Dong, F. Wang, Q. Yang, Y. He, C. Zhang, P. Jin and L. Feng, *Nat Commun*, 2023, **14**, 1686.
- S2. H. Xie, Y. Feng, X. He, Y. Zhu, Z. Li, H. Liu, S. Zeng, Q. Qian and G. Zhang, *Small*, 2023, **19**, e2207425.
- S3. T. Wang, L. Miao, S. Zheng, H. Qin, X. Cao, L. Yang and L. Jiao, *Acs Catal*, 2023, **13**, 4091-4100.
- S4. J. Hao, J. W. Liu, D. Wu, M. X. Chen, Y. Liang, Q. Wang, L. Wang, X. Z. Fu and J. L. Luo, *Appl Catal B-Environ*, 2021, **281**, 119510.
- S5. L. S. Wu, M. T. Zhang, Z. H. Wen and S. Q. Ci, *Chemical Engineering Journal*, 2020, **399**, 125728.
- S6. Y. Li, X. Wei, L. Chen, J. Shi and M. He, *Nat Commun*, 2019, **10**, 5335.
- S7. N. Zhang, Y. Hu, L. An, Q. Li, J. Yin, J. Li, R. Yang, M. Lu, S. Zhang, P. Xi and C. H. Yan, *Angew Chem Int Ed Engl*, 2022, **61**, e202207217.
- S8. X. Wang, Z. Mao, X. Mao, X. Hu, F. Gao, M. Gao, Q. L. Wu, X. Lyu, A. Du, X. Xu, Y. Jia and L. Wang, *Adv Sci (Weinh)*, 2023, **10**, e2206204.
- S9. S. Zhang, C. Tan, R. Yan, X. Zou, F. L. Hu, Y. Mi, C. Yan and S. Zhao, *Angew Chem Int Ed Engl*, 2023, **62**, e202302795.
